CORRECTION

# Correction: Molecular and Morphological Analyses Reveal Phylogenetic Relationships of Stingrays Focusing on the Family Dasyatidae (Myliobatiformes)

Kean Chong Lim, Phaik-Eem Lim, Ving Ching Chong, Kar-Hoe Loh

There are errors in identification steps 1a and 1b in the “Key to the families of Order Myliobatiformes” subsection of the Results. The correct step 1a is: Disc broad and laterally expanded with wing like pectoral fin, disc width more than 1.3 times disc length (Fig 5A & 5B). . . . .2. The correct step 1b is: Disc not greatly expanded, diamond or round shaped, disc width less than 1.3 times disc length (Fig 6). . . . .3.

## Reference

1. Lim KC, Lim P-E, Chong VC, Loh K-H (2015) Molecular and Morphological Analyses Reveal Phylogenetic Relationships of Stingrays Focusing on the Family Dasyatidae (Myliobatiformes). PLoS ONE 10 (4): e0120518. doi:[10.1371/journal.pone.0120518](https://doi.org/10.1371/journal.pone.0120518) PMID: [25867639](https://pubmed.ncbi.nlm.nih.gov/25867639/)

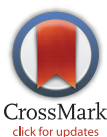

## OPEN ACCESS

**Citation:** Lim KC, Lim P-E, Chong VC, Loh K-H (2015) Correction: Molecular and Morphological Analyses Reveal Phylogenetic Relationships of Stingrays Focusing on the Family Dasyatidae (Myliobatiformes). PLoS ONE 10(5): e0129411. doi:[10.1371/journal.pone.0129411](https://doi.org/10.1371/journal.pone.0129411)

**Published:** May 26, 2015

**Copyright:** © 2015 Lim et al. This is an open access article distributed under the terms of the [Creative Commons Attribution License](https://creativecommons.org/licenses/by/4.0/), which permits unrestricted use, distribution, and reproduction in any medium, provided the original author and source are credited.
